# Supplementary material for: Timing of Aspirin Use Among Patients With Colorectal Cancer in Relation to Mortality: A Systematic Review and Meta-Analysis
Source: PubMed Central journal article supplement — JNCI Cancer Spectr. 2021 Jul 14;5(5):pkab067. doi: 10.1093/jncics/pkab067 (PMC8421810; doi:10.1093/jncics/pkab067), 2021-07-14
Supplement: pkab067_supplementary_data.pdf [file pkab067_supplementary_data.pdf]

## **Supplementary Material**

### **Supplementary Methods**

Search strategy

MOOSE checklist for meta-analysis of observational study

### **Supplementary Tables**

Supplementary Table 1. Ongoing clinical trials of aspirin as adjuvant agent in CRC treatment

Supplementary Table 2. The risk estimate in individual study

Supplementary Table 3. Newcastle-Ottawa Scale for Cohort Study Quality

Supplementary Table 4. Newcastle-Ottawa Scale for Case-Control Study Quality

### **Supplementary Figures**

Supplementary Figure 1. Graphical illustration of different timing of aspirin use.

Supplementary Figure 2. Forest plots of ever use of aspirin in relation to CRC mortality.

Supplementary Figure 3. Forest plots of prediagnosis use of aspirin use in relation to CRC mortality

Supplementary Figure 4. Forest plots of continued use of aspirin use in relation to CRC mortality.

Supplementary Figure 5. Forest plots of postdiagnosis use of aspirin use in relation to CRC mortality.

Supplementary Figure 6. Forest plots of CRC mortality regarding aspirin use after diagnosis regardless of its use before diagnosis.

## Supplementary Methods

### Search strategy

PubMed (from inception to 25 April)

#1 "colorectal neoplasms"[MeSH Terms] 198667

#2 "colorectal neoplas\*"[Title/Abstract] OR "colorectal tumo\*"[Title/Abstract] OR "colorectal cancer\*"[Title/Abstract] OR "colorectal carcinoma\*"[Title/Abstract] OR "colorectal adenocarcinoma\*"[Title/Abstract] OR "colorectal malign\*"[Title/Abstract] 119424

#3 "colon tumor"[Title/Abstract] OR "colon cancer"[Title/Abstract] OR "colon carcinoma"[Title/Abstract] OR "colon adenocarcinoma"[Title/Abstract] 59736

#4 "rectal tumor"[Title/Abstract] OR "rectal cancer"[Title/Abstract] OR "rectal carcinoma"[Title/Abstract] OR "rectal adenocarcinoma"[Title/Abstract] OR "rectum tumor"[Title/Abstract] OR "rectum cancer"[Title/Abstract] OR "rectum carcinoma"[Title/Abstract] OR "rectum adenocarcinoma"[Title/Abstract] 26968

#5 #1 OR #2 OR #3 OR #4 253563

#6 "aspirin"[Title/Abstract] 48471

#7 "acetylsalicylic acid"[Title/Abstract] 9509

#8 "NSAIDs"[Title/Abstract] 19379

#9 "nonsteroidal anti-inflammatory drugs"[Title/Abstract] 11864

#10 #6 OR #7 OR #8 OR #9 77567

#11 "death"[Title/Abstract] 700655

#12 "mortality"[Title/Abstract] 747496

#13 "survival"[Title/Abstract] 926214

#14 #11 OR #12 OR #13 2027380

#15 #5 AND #10 AND #14 538

Embase

#1 'colorectal cancer'/exp 176652

#2 'colorectal neoplas\*':ti,ab 5780

#3 'colorectal tumo\*':ti,ab 9569  
#4 'colorectal carcinoma\*':ti,ab 21898  
#5 'colorectal adenocarcinoma\*':ti,ab 6247  
#6 'colorectal malign\*':ti,ab 1152  
#7 #2 OR #3 OR #4 OR #5 OR #6 41116  
#8 'colon tumor':ti,ab 3105  
#9 'colon cancer':ti,ab 65730  
#10 'colon carcinoma':ti,ab 13230  
#11 'colon adenocarcinoma':ti,ab 5553  
#12 #8 OR #9 OR #10 OR #11 81982  
#13 'rectal tumor':ti,ab 986  
#14 'rectal cancer':ti,ab 35025  
#15 'rectal carcinoma':ti,ab 4709  
#16 'rectal adenocarcinoma':ti,ab 3205  
#17 'rectum tumor':ti,ab 62  
#18 'rectum cancer':ti,ab 837  
#19 'rectum carcinoma':ti,ab 378  
#20 'rectum adenocarcinoma':ti,ab 119  
#21 #13 OR #14 OR #15 OR #16 OR #17 OR #18 OR #19 OR #20 40,954  
#22 #1 OR #7 OR #12 OR #21 287095  
#23 'aspirin':ti,ab 73464  
#24 'acetylsalicylic acid':ti,ab 12681  
#25 'nsaids':ti,ab 32325  
#26 'nonsteroidal anti-inflammatory drugs':ti,ab 14024  
#27 #23 OR #24 OR #25 OR #26 117914  
#28 'death':ti,ab 980289  
#29 'mortality':ti,ab 1086766  
#30 'survival':ti,ab 1363439  
#31 #28 OR #29 OR #30 2890894

#32 #22 AND #27 AND #31 798

#### Cochrane Library

#1 MeSH descriptor: [Colorectal Neoplasms] explode all trees 7912

#2 (colorectal neoplas\*):ti,ab,kw 7595

#3 (colorectal tumo\*):ti,ab,kw 4637

#4 (colorectal cancer\*):ti,ab,kw 13779

#5 (colorectal carcinoma\*):ti,ab,kw 2035

#6 (colorectal adenocarcinoma\*):ti,ab,kw 1176

#7 (colorectal malign\*):ti,ab,kw 1043

#8 #2 or #3 or #4 or #5 or #6 or #7 15414

#9 (colon tumor):ti,ab,kw 1865

#10 (colon cancer):ti,ab,kw 5249

#11 (colon carcinoma):ti,ab,kw 925

#12 colon adenocarcinoma 839

#13 #9 or #10 or #11 or #12 5896

#14 (rectal tumor):ti,ab,kw 1788

#15 (rectal cancer):ti,ab,kw 4797

#16 (rectal carcinoma):ti,ab,kw 956

#17 (rectal adenocarcinoma):ti,ab,kw 801

#18 (rectum tumor):ti,ab,kw 1440

#19 (rectum cancer):ti,ab,kw 3365

#20 (rectum carcinoma):ti,ab,kw 822

#21 (rectum adenocarcinoma):ti,ab,kw 697

#22 #14 or #15 or #16 or #17 or #18 or #19 or #20 or #21 6613

#23 #1 or #8 or #13 or #22 22882

#24 (aspirin):ti,ab,kw 13464

#25 (acetylsalicylic acid):ti,ab,kw 5176

#26 (NSAIDs):ti,ab,kw 4423

#27 (nonsteroidal anti-inflammatory drugs):ti,ab,kw 4628

#28 #24 or #25 or #26 or #2722274

#29 (death):ti,ab,kw 59156

#30 (mortality):ti,ab,kw 86384

#31 (survival):ti,ab,kw 99941

#32 #29 or #30 or #31 185225

#33 #23 and #28 and #32 124

## MOOSE checklist for meta-analysis of observational study

| Category                                                                                                                                                                                                                                                                     | Reported on                     |
|------------------------------------------------------------------------------------------------------------------------------------------------------------------------------------------------------------------------------------------------------------------------------|---------------------------------|
| Reporting of background should include                                                                                                                                                                                                                                       |                                 |
| Problem definition                                                                                                                                                                                                                                                           | Introduction                    |
| Hypothesis statement                                                                                                                                                                                                                                                         |                                 |
| Description of study outcome(s)                                                                                                                                                                                                                                              |                                 |
| Type of exposure or intervention used                                                                                                                                                                                                                                        |                                 |
| Type of study designs used                                                                                                                                                                                                                                                   |                                 |
| Study population                                                                                                                                                                                                                                                             |                                 |
| Reporting of search strategy should include                                                                                                                                                                                                                                  |                                 |
| Qualifications of searchers (eg, librarians and investigators)                                                                                                                                                                                                               | search                          |
| Search strategy, including time period included in the synthesis and keywords                                                                                                                                                                                                | strategy and selection criteria |
| Effort to include all available studies, including contact with authors                                                                                                                                                                                                      |                                 |
| Databases and registries searched Search software used, name and version, including special features used (eg, explosion)                                                                                                                                                    |                                 |
| Use of hand searching (eg, reference lists of obtained articles)                                                                                                                                                                                                             |                                 |
| List of citations located and those excluded, including justification                                                                                                                                                                                                        |                                 |
| Method of addressing articles published in languages other than English                                                                                                                                                                                                      |                                 |
| Method of handling abstracts and unpublished studies                                                                                                                                                                                                                         |                                 |
| Description of any contact with authors                                                                                                                                                                                                                                      |                                 |
| Reporting of methods should include                                                                                                                                                                                                                                          |                                 |
| Description of relevance or appropriateness of studies assembled for assessing the hypothesis to be tested                                                                                                                                                                   | data analysis                   |
| Rationale for the selection and coding of data (eg, sound clinical principles or convenience)                                                                                                                                                                                |                                 |
| Documentation of how data were classified and coded (eg, multiple raters, blinding, and interrater reliability)                                                                                                                                                              |                                 |
| Assessment of confounding (eg, comparability of cases and controls in studies where appropriate)                                                                                                                                                                             |                                 |
| Assessment of study quality, including blinding of quality assessors; stratification or regression on possible predictors of study results                                                                                                                                   |                                 |
| Assessment of heterogeneity                                                                                                                                                                                                                                                  |                                 |
| Description of statistical methods (eg, complete description of fixed or random effects models, justification of whether the chosen models account for predictors of study results, dose-response models, or cumulative meta-analysis) in sufficient detail to be replicated |                                 |
| Provision of appropriate tables and graphics                                                                                                                                                                                                                                 |                                 |
| Reporting of results should include                                                                                                                                                                                                                                          |                                 |
| Graphic summarizing individual study estimates and overall estimate                                                                                                                                                                                                          | Results,                        |

---

|                                                                                                                           |                   |
|---------------------------------------------------------------------------------------------------------------------------|-------------------|
| Table giving descriptive information for each study included                                                              | Table 1, Table 2, |
| Results of sensitivity testing (eg, subgroup analysis)                                                                    | Figure 1, Figure  |
| Indication of statistical uncertainty of findings                                                                         | 2, Supplementary  |
|                                                                                                                           | Table 2-4,        |
|                                                                                                                           | Supplementary     |
|                                                                                                                           | Figure 2-3        |
|                                                                                                                           |                   |
| Reporting of discussion should include                                                                                    |                   |
| Quantitative assessment of bias (eg, publication bias)                                                                    | Discussion        |
| Justification for exclusion (eg, exclusion of non-English-language citations)                                             |                   |
| Assessment of quality of included studies                                                                                 |                   |
|                                                                                                                           |                   |
| Reporting of conclusions should include                                                                                   |                   |
| Consideration of alternative explanations for observed results                                                            | Conclusions,      |
| Generalization of the conclusions (ie, appropriate for the data presented and within the domain of the literature review) | Disclosures       |
| Guidelines for future research                                                                                            |                   |
| Disclosure of funding source                                                                                              |                   |

---

**Supplementary Table 1. Ongoing clinical trials of aspirin as adjuvant agent in CRC treatment**

| Trail name <sup>a</sup>                              | Trail number | Starting time | Design                                            | Patients                                                                                                                                   | Country                                | Dose and duration                       | Primary outcome                                                                                                                                                                      | Secondary outcome                                                                                                                                                                                                                                                                              |
|------------------------------------------------------|--------------|---------------|---------------------------------------------------|--------------------------------------------------------------------------------------------------------------------------------------------|----------------------------------------|-----------------------------------------|--------------------------------------------------------------------------------------------------------------------------------------------------------------------------------------|------------------------------------------------------------------------------------------------------------------------------------------------------------------------------------------------------------------------------------------------------------------------------------------------|
| ASCOLT                                               | NCT00565708  | 2007          | Double-blind, placebo controlled, multicenter RCT | Duke B and high risk Duke C CRC                                                                                                            | Australia                              | 200mg once daily for 3 years            | DFS                                                                                                                                                                                  | OS                                                                                                                                                                                                                                                                                             |
| ASPIRIN                                              | NCT02301286  | 2015          | Double-blind, placebo controlled RCT              | Stage II-III colon cancer patients aged $\geq 45$ years old                                                                                | Netherlands                            | 80mg once daily for 5 years             | 5-year OS                                                                                                                                                                            | DFS, time to treatment failure                                                                                                                                                                                                                                                                 |
| APREMEC                                              | NCT02607072  | 2015          | Double-blind, placebo controlled, multicenter RCT | Postsurgical non-metastasized colorectal cancer patients                                                                                   | China                                  | 200mg daily, 100mg daily                | 3-year DFS                                                                                                                                                                           | —                                                                                                                                                                                                                                                                                              |
| ADD-Aspirin                                          | NCT02804815  | 2015          | Double-blind, placebo controlled RCT              | Non-metastatic common solid tumors (colorectal cancer, breast cancer, prostate cancer, gastro-oesophageal cancer) aged $\geq 16$ years old | UK                                     | 100mg, 300mg daily for at least 5 years | OS of all cohorts combined, invasive DFS in breast cancer cohort, DFS in colorectal cancer cohort, OS in gastro-oesophageal cancer cohort, biochemical RFS in prostate cancer cohort | Adherence, Number of participants with serious hemorrhage, Number of participants with treatment-related cardiovascular events, Number of participants with second malignancies as assessed by case report form, Number of participants that show a decline in cognition and extent of decline |
| Adjuvant Aspirin Treatment for Colon Cancer Patients | NCT02467582  | 2016          | Double-blind, placebo controlled, multicenter RCT | <i>PIK3CA</i> mutated colon cancer patients aged $\geq 18$ years old                                                                       | Belgium, Germany, Hungary, Switzerland | 100mg daily for 3 years                 | DFS                                                                                                                                                                                  | time to recurrence, OS, cancer-specific survival, adverse events                                                                                                                                                                                                                               |



|                       |             |      |                                                                                       |                                                                                                   |                         |                                                                        |                                                                                                         |                                                                                                                                                                                                                       |
|-----------------------|-------------|------|---------------------------------------------------------------------------------------|---------------------------------------------------------------------------------------------------|-------------------------|------------------------------------------------------------------------|---------------------------------------------------------------------------------------------------------|-----------------------------------------------------------------------------------------------------------------------------------------------------------------------------------------------------------------------|
| ALASCCA               | NCT02647099 | 2016 | Double-blind, placebo controlled, biomarker-based RCT                                 | <i>PIK3CA</i> mutated colorectal cancer patients aged $\geq 18$ years old                         | Sweden                  | 160mg daily for 3 years                                                | Time to recurrence                                                                                      | DFS, OS, frequency and severity of adverse events                                                                                                                                                                     |
| ASAMET                | NCT03047837 | 2017 | Double-blind, placebo controlled, multicenter RCT with 2x2 factorial design biomarker | Stage I-III colorectal cancer patients aged $\geq 18$ years old                                   | Italy                   | Aspirin 100mg daily for 12 months, Metformin 850mg daily for 12 months | <i>NF-<math>\kappa</math>B</i> in colonic tissues                                                       | <i>Ps6k</i> , <i>p53</i> , beta-catenin, <i>PI3K</i> in colonic tissues; IL-6, CRP, VEGF and HOMA index in blood; gene expression levels of candidate genes and pathways; metformin concentration in tissue and blood |
| ASAC                  | NCT03326791 | 2017 | Double-blind, placebo controlled, multicenter RCT                                     | patients (aged $\geq 18$ years old) treated with resection for colorectal cancer liver metastases | Denmark, Norway, Sweden | 160mg once daily for 3 years or till disease recurrence                | DFS                                                                                                     | Time to recurrence, OS, health-related quality of life, cost-effectiveness analyses                                                                                                                                   |
| ICAR                  | NCT03170115 | 2017 | RCT                                                                                   | High risk locally advanced rectal cancer                                                          | Brazil                  | 100mg daily during the chemoradiotherapy                               | Tumor downstaging after induction chemotherapy                                                          | Radiological Tumor response rate after induction chemotherapy, Pathological Tumor response rate, Pathologic complete response, DFS, OS                                                                                |
| ASPIRIN Trial Belgium | NCT03464305 | 2018 | Double-blind, placebo controlled RCT                                                  | Stage II-III colon cancer patients aged $\geq 45$ years old                                       | Antwerp                 | 80mg once daily for 5 years                                            | 5-year OS                                                                                               | DFS, time to treatment failure                                                                                                                                                                                        |
| ASPIK French          | NCT02945033 | 2018 | Double-blind, placebo controlled RCT                                                  | <i>PIK3CA</i> mutated stage III or II high risk colon cancer patients aged $\geq 18$ years old    | France                  | 100mg once daily for 3 years                                           | Number of patient with local or distant recurrence or second colorectal cancer or death from any cause, | Number of patient with local or distant recurrence or second colorectal cancer or death from any cause, whichever occurred first; Number of alive patient;                                                            |

---

|                             |                                                                                                                                                                                                  |
|-----------------------------|--------------------------------------------------------------------------------------------------------------------------------------------------------------------------------------------------|
| whichever<br>occurred first | Number of pills taken by<br>the patient for<br>compliance evaluation;<br>Number of severe<br>bleeding grade 3-4<br>events;<br>Number of participants<br>with treatment-related<br>adverse events |
|-----------------------------|--------------------------------------------------------------------------------------------------------------------------------------------------------------------------------------------------|

---

<sup>a</sup>All of these trials are ongoing studies, relevant data or papers are not published now. CRC = colorectal cancer, RCT = randomized clinical trial, DFS = disease free survival, OS = overall survival, NF-κB = nuclear factor kappa B, CRP = c-reactive protein, VEGF = vascular endothelial growth factor, HOMA index = homeostasis model assessment (fasting blood glucose (mmol/L)\*insulin (mU/L))/22.5.

**Supplementary Table 2. The risk estimate in individual study**

| Study                                          | Country            | Aspirin use and the prognosis of patients                                                                                                                                                  |                                                                                                                                                                                                                                |                                                                                                      | Adjustments |                                                                                                                                                                                                                                                                                                |
|------------------------------------------------|--------------------|--------------------------------------------------------------------------------------------------------------------------------------------------------------------------------------------|--------------------------------------------------------------------------------------------------------------------------------------------------------------------------------------------------------------------------------|------------------------------------------------------------------------------------------------------|-------------|------------------------------------------------------------------------------------------------------------------------------------------------------------------------------------------------------------------------------------------------------------------------------------------------|
|                                                |                    | Timing of Aspirin use <sup>a</sup>                                                                                                                                                         | Molecular marker                                                                                                                                                                                                               | Site of primary tumor                                                                                |             | Tumor stage                                                                                                                                                                                                                                                                                    |
| Chan AT, et al.<br>2009 (1)                    | The USA            | HR(95%CI)<br>Timing 4<br>CSS 0.89 (0.59-1.35)<br>OS 0.95 (0.71-1.28)<br>Timing 5<br>CSS 0.53 (0.33-0.86)<br>OS 0.68 (0.51-0.92)<br>Timing 6<br>CSS 0.71 (0.53-0.95)<br>OS 0.79 (0.65-0.97) | HR(95%CI)<br>COX2<br>High<br>Timing 4<br>CSS 0.56 (0.23-1.33)<br>Timing 5<br>CSS 0.22 (0.07-0.74)<br>Timing 6<br>CSS 0.39 (0.20-0.76)<br>OS 0.62 (0.42-0.93)<br>Low<br>Timing 6<br>CSS 1.22 (0.36-4.18)<br>OS 1.05 (0.55-2.02) | —                                                                                                    | I-III       | age, sex, date of diagnosis of cancer, stage, tumor site, histological grade, time from diagnosis to first measurement of postdiagnosis aspirin use, smoking, metabolic equivalent tasks per week after diagnosis, BMI, family history in a first-degree relative, use of aspirin prediagnosis |
| Zell JA, et al.<br>2009 (2)                    | The USA            | HR(95%CI)<br>Timing 2<br>CSS 0.62 (0.41-0.94)<br>OS 0.74 (0.54-1.01)                                                                                                                       | —                                                                                                                                                                                                                              | —                                                                                                    | —           | age, tumor site, stage, time from NSAIDs assessment to CRC diagnosis, surgery, family history in a first-degree relative                                                                                                                                                                       |
| Din FV, et al.<br>2010 (3)                     | The UK             | OR(95%CI)<br>Timing 2<br>CSS 1.03 (0.80-1.31)<br>OS 1.12 (0.90-1.39)                                                                                                                       | —                                                                                                                                                                                                                              | —                                                                                                    | —           | age, sex, stage, family history                                                                                                                                                                                                                                                                |
| Case-control<br>Coghill AE, et al.<br>2011 (4) | The USA            | HR(95%CI)<br>Timing 2<br>CSS 0.76 (0.61-0.95)                                                                                                                                              | —                                                                                                                                                                                                                              | HR(95%CI)<br>Colon<br>Timing 2<br>CSS 0.62 (0.40-0.94)<br>Rectal<br>Timing 2<br>CSS 1.03 (0.72-1.47) | —           | age, sex, stage, BMI, screening, smoking, diabetes and prior inflammatory conditions, first-course treatment                                                                                                                                                                                   |
| Bastiaannet E, et al.<br>2012 (5)              | The<br>Netherlands | RR(95%CI)<br>Timing 4<br>OS 0.88 (0.83-0.94)<br>Timing 5<br>OS 0.77 (0.63-0.95)                                                                                                            | —                                                                                                                                                                                                                              | RR(95%CI)<br>Colon<br>Timing 3<br>OS 1.5 (1.2-1.8)<br>Timing 4                                       | —           | sex, age, comorbidity, year of incidence, grade, stage, chemotherapy (colon cancer), radiotherapy (rectal cancer), surgery                                                                                                                                                                     |

|                             |                |                                              |                                                                                                                                                                                                                                                                                                                                                                                                                                     |                                                                                                                                                                       |   |   |                                                                                                                                                                                                                                                                                                                                                                                                           |
|-----------------------------|----------------|----------------------------------------------|-------------------------------------------------------------------------------------------------------------------------------------------------------------------------------------------------------------------------------------------------------------------------------------------------------------------------------------------------------------------------------------------------------------------------------------|-----------------------------------------------------------------------------------------------------------------------------------------------------------------------|---|---|-----------------------------------------------------------------------------------------------------------------------------------------------------------------------------------------------------------------------------------------------------------------------------------------------------------------------------------------------------------------------------------------------------------|
|                             |                |                                              |                                                                                                                                                                                                                                                                                                                                                                                                                                     | OS 0.89 (0.82-0.96)<br>Timing 5<br>OS 0.65 (0.50-0.84)<br>Rectal<br>Timing 3<br>OS 1.4 (1.0-2.0)<br>Timing 4<br>OS 0.87(0.78-0.97)<br>Timing 5<br>OS 1.10 (0.79-1.54) |   |   |                                                                                                                                                                                                                                                                                                                                                                                                           |
| Liao X, et al.<br>2012 (6)  | The USA        | —                                            | HR(95%CI)<br><i>PIK3CA</i><br>Timing 4<br>Wild type<br>CSS 0.92 (0.56-1.51)<br>OS 0.85 (0.60-1.21)<br>Mutation<br>CSS 0.18 (0.04-0.92)<br>OS 0.60 (0.26-1.40)<br>Timing 5<br>Wild type<br>CSS 0.90 (0.53-1.54)<br>OS 0.97 (0.68-1.37)<br>Mutation<br>CSS 0.28 (0.04-2.10)<br>OS 0.59 (0.24-1.41)<br>Timing 6<br>Wild type<br>CSS 0.96 (0.69-1.32)<br>OS 0.94 (0.75-1.17)<br>Mutation<br>CSS 0.18 (0.06-0.61)<br>OS 0.54 (0.31-0.94) | —                                                                                                                                                                     | — | — | age, sex, year of diagnosis, stage, time from diagnosis to first measurement of aspirin use after diagnosis, regular use or nonuse of aspirin before diagnosis, tumor site, tumor differentiation, BMI, microsatellite instability status, CpG island methylator phenotype, <i>KRAS</i> mutation, <i>BRAF</i> mutation, <i>LINE-1</i> methylation, and the presence or absence of <i>COX2</i> expression. |
| Reimers MS, et al. 2012 (7) | The Netherland | RR(95%CI)<br>Timing 5<br>OS 0.59 (0.44-0.81) | —                                                                                                                                                                                                                                                                                                                                                                                                                                   | —                                                                                                                                                                     | — | — | age, sex, stage, year of diagnosis, grade, adjuvant chemotherapy, surgery, comorbidity                                                                                                                                                                                                                                                                                                                    |
| Walker AJ, et al. 2012 (8)  | The UK         | HR(95%CI)<br>Timing 4                        | —                                                                                                                                                                                                                                                                                                                                                                                                                                   | —                                                                                                                                                                     | — | — | age, gender, smoking, BMI, alcohol use and comorbidity                                                                                                                                                                                                                                                                                                                                                    |

|                                |         |                                             |                                                   |                     |        |                                                                                                                |    |
|--------------------------------|---------|---------------------------------------------|---------------------------------------------------|---------------------|--------|----------------------------------------------------------------------------------------------------------------|----|
|                                |         | OS 0.86 (0.76-0.98)<br>Timing 5             |                                                   |                     |        |                                                                                                                |    |
|                                |         | OS 0.99 (0.84-1.16)<br>Timing 6             |                                                   |                     |        |                                                                                                                |    |
| Chae YK, et al.<br>2013 (9)    | The USA | OS 0.91(0.82-1.00)<br>HR(95%CI)<br>Timing 1 | HR(95%CI)<br><i>PIK3CA</i>                        | —                   | —      |                                                                                                                | NA |
| Conference<br>abstract         |         | OS 1.37 (0.80-2.35)                         | Timing 1<br>Wild type                             |                     |        |                                                                                                                |    |
|                                |         |                                             | OS 1.80 (1.01-3.23)<br>Mutation                   |                     |        |                                                                                                                |    |
| Domingo E, et<br>al. 2013 (10) | The UK  | —                                           | OS 0.75 (0.17-3.20)<br>HR(95%CI)<br><i>PIK3CA</i> | —                   | II-III | age, sex, stage, tumor site, tumor grade,<br>microsatellite instability, prior<br>chemotherapy or radiotherapy |    |
|                                |         |                                             | Timing 6<br>Wild type                             |                     |        |                                                                                                                |    |
|                                |         |                                             | OS 0.95 (0.56-1.61)<br>RFS 0.94 (0.59-1.49)       |                     |        |                                                                                                                |    |
|                                |         |                                             | Mutation                                          |                     |        |                                                                                                                |    |
|                                |         |                                             | OS 0.29(0.04-2.33)<br>RFS 0.11 (0.001-<br>0.832)  |                     |        |                                                                                                                |    |
|                                |         |                                             | <i>COX-2</i>                                      |                     |        |                                                                                                                |    |
|                                |         |                                             | Timing 6<br>High                                  |                     |        |                                                                                                                |    |
|                                |         |                                             | RFS 0.55 (0.16-1.91)<br>Low                       |                     |        |                                                                                                                |    |
| McCowan C, et<br>al. 2013 (11) | The UK  | HR(95%CI)<br>Timing 2                       | —                                                 | HR(95%CI)<br>Colon  | —      | age, sex, stage, aspirin use pre-diagnosis,<br>socio-economic status                                           |    |
|                                |         | CSS 0.96 (0.84-1.11)<br>OS 0.99 (0.90-1.09) |                                                   | Timing 6<br>Rectal  |        |                                                                                                                |    |
|                                |         | Timing 6                                    |                                                   | Timing 6            |        |                                                                                                                |    |
|                                |         | CSS 0.58 (0.45-0.75)<br>OS 0.67 (0.57-0.79) |                                                   | OS 0.80 (0.58-1.11) |        |                                                                                                                |    |
| Sun R, et al.<br>2013 (12)     | The USA | —                                           | HR(95%CI)<br><i>β-catenin</i>                     | —                   | —      |                                                                                                                | NA |

|                               |           |                                                          | Timing 6                                                |                                            |       |                                                                                                                                                                   |
|-------------------------------|-----------|----------------------------------------------------------|---------------------------------------------------------|--------------------------------------------|-------|-------------------------------------------------------------------------------------------------------------------------------------------------------------------|
| Conference abstract           |           |                                                          | Positive<br>CSS 0.53 (0.30-0.95)<br>OS 0.65 (0.53-0.80) |                                            |       |                                                                                                                                                                   |
|                               |           |                                                          | Negative<br>CSS 1.06 (0.62-1.83)<br>OS 0.84 (0.70-1.01) |                                            |       |                                                                                                                                                                   |
| Cardwell CR, et al. 2014 (13) | The UK    | OR(95%CI)                                                | —                                                       | OR(95%CI)                                  | —     | stage, grade, surgery within 6 months of diagnosis, chemotherapy within 6 months, radiotherapy within 6 months, statin use, metformin use, comorbidities, smoking |
| Case-control                  |           | Timing 2<br>CSS 1.03 (0.91-1.17)                         |                                                         | Colon<br>Timing 2<br>CSS 0.99 (0.84-1.17)  |       |                                                                                                                                                                   |
|                               |           | Timing 4<br>CSS 0.72 (0.44-1.18)                         |                                                         | Timing 4<br>CSS 0.88 (0.49-1.59)           |       |                                                                                                                                                                   |
|                               |           | Timing 5<br>CSS 0.95 (0.69-1.32)                         |                                                         | Timing 5<br>CSS 0.93 (0.59-1.47)           |       |                                                                                                                                                                   |
|                               |           | Timing 6<br>CSS 1.06 (0.92-1.24)                         |                                                         | Timing 6<br>CSS 1.02 (0.83-1.25)           |       |                                                                                                                                                                   |
|                               |           | OS 1.06 (0.94-1.19)                                      |                                                         | OS 1.10 (0.86-1.18)                        |       |                                                                                                                                                                   |
|                               |           |                                                          |                                                         | Rectal<br>Timing 2<br>CSS 1.11 (0.91-1.35) |       |                                                                                                                                                                   |
|                               |           |                                                          |                                                         | Timing 4<br>CSS 0.43 (0.16-1.13)           |       |                                                                                                                                                                   |
|                               |           |                                                          |                                                         | Timing 5<br>CSS 1.00 (0.61-1.65)           |       |                                                                                                                                                                   |
|                               |           |                                                          |                                                         | Timing 6<br>CSS 1.10 (0.88-1.38)           |       |                                                                                                                                                                   |
|                               |           |                                                          |                                                         | OS 1.12 (0.93-1.36)                        |       |                                                                                                                                                                   |
| Goh CH, et al. 2014 (14)      | Singapore | unadjusted HR(95%CI)                                     | —                                                       | —                                          | I-III | NA                                                                                                                                                                |
|                               |           | Timing 1<br>CSS 1.06 (0.71-1.58)<br>RFS 1.04 (0.72-1.48) |                                                         |                                            |       |                                                                                                                                                                   |
|                               |           | Timing 3<br>CSS 1.76 (1.09-2.83)<br>RFS 1.56 (1.01-2.43) |                                                         |                                            |       |                                                                                                                                                                   |
|                               |           | Timing 5<br>CSS 0.81 (0.51-1.28)<br>RFS 0.86 (0.58-1.27) |                                                         |                                            |       |                                                                                                                                                                   |

|                              |                |   |                                                                                                                 |                                                                                                       |     |                                                                                                                                                                       |
|------------------------------|----------------|---|-----------------------------------------------------------------------------------------------------------------|-------------------------------------------------------------------------------------------------------|-----|-----------------------------------------------------------------------------------------------------------------------------------------------------------------------|
| Reimers MS, et al. 2014 (15) | The Netherland | — | —                                                                                                               | HR(95%CI)<br>Colon<br>Timing 6<br>OS 0.64 (0.49-0.83)                                                 | —   | sex, age, comorbidity, year of incidence, histologic grade, stage, and chemotherapy                                                                                   |
| Colon cancer only            |                |   |                                                                                                                 | <i>PIK3CA</i><br>Timing 6<br>Mutation<br>OS 0.73 (0.33-1.63)<br>Wild type<br>OS 0.55 (0.40-0.75)      |     |                                                                                                                                                                       |
|                              |                |   |                                                                                                                 | <i>COX2</i><br>Timing 6<br>High<br>OS 0.68(0.48-0.97)<br>Low<br>OS 0.59(0.38-0.97)                    |     |                                                                                                                                                                       |
|                              |                |   |                                                                                                                 | <i>HLA</i><br>Timing 6<br>Positive<br>OS 0.53 (0.38-0.74)<br>Negative<br>OS 1.03 (0.66-1.61)          |     |                                                                                                                                                                       |
| Kothari N, et al. 2015 (16)  | Australia      | — | Unadjusted<br>HR(95%CI)<br><i>PIK3CA</i><br>Timing 2<br>Mutation<br>CSS 0.60 (0.34-1.16)<br>OS 0.96 (0.58-1.57) | —                                                                                                     | —   | NA                                                                                                                                                                    |
| Ng K, et al. 2015 (17)       | The USA        | — | —                                                                                                               | HR(95%CI)<br>Colon<br>Timing 1<br>OS 0.63 (0.35-1.12)<br>RFS 0.51 (0.28-0.95)<br>DFS 0.68 (0.42-1.11) | III | age, sex, race, adjuvant treatment arm, family history, baseline performance status, depth of invasion, number of positive lymph nodes, grade, BMI, physical activity |
| Colon cancer only            |                |   |                                                                                                                 |                                                                                                       |     |                                                                                                                                                                       |

|                                                   |                |                                                                                                                                                                                          |                                                                  |                                                                                                                                                               |                                                                                                          |                                                                                                                                                                                                                                                                                                                                                                                               |
|---------------------------------------------------|----------------|------------------------------------------------------------------------------------------------------------------------------------------------------------------------------------------|------------------------------------------------------------------|---------------------------------------------------------------------------------------------------------------------------------------------------------------|----------------------------------------------------------------------------------------------------------|-----------------------------------------------------------------------------------------------------------------------------------------------------------------------------------------------------------------------------------------------------------------------------------------------------------------------------------------------------------------------------------------------|
| Restivo A, et al. 2015 (18)<br>Rectal cancer only | Italy          | —                                                                                                                                                                                        | —                                                                | HR(95%CI)<br>Rectal<br>Timing 5<br>OS 0.21 (0.05-0.89)<br>PFS 0.2 (0.07-0.60)<br>Risk of metastasis<br>0.30 (0.10-0.86)<br>Local recurrence<br>0.6 (0.06-4.5) | II-III                                                                                                   | NA                                                                                                                                                                                                                                                                                                                                                                                            |
| Zanders MM, et al. 2015 (19)                      | The Netherland | HR(95%CI)<br>Timing 1<br>OS 0.96 (0.73-1.26)                                                                                                                                             | —                                                                | HR(95%CI)<br>Colon<br>Timing 1<br>OS 0.76 (0.55-1.06)<br>Rectal<br>Timing 1<br>OS 1.49 (0.86-2.60)                                                            | HR(95%CI)<br>Stage I-III<br>Timing 1<br>OS 0.98(0.70-1.37)<br>Stage IV<br>Timing 1<br>OS 1.20(0.66-2.17) | age, sex, calendar year of CRC diagnosis, tumor site, stage, administration of surgery/radiotherapy and/or chemotherapy, use of metformin, sulfonylurea derivatives, insulin, other diabetes medication, statins and aspirin after diagnosis as time-dependent cumulative exposure and as time-dependent ever-never terms, the use of these drugs before diagnosis as a dichotomized variable |
| Babic A, et al. 2016 (20)                         | The USA        | —                                                                                                                                                                                        | HR(95%CI)<br>sTNF-RII<br>Timing 6<br>High<br>OS 0.52 (0.20-1.33) | —                                                                                                                                                             | —                                                                                                        | NA                                                                                                                                                                                                                                                                                                                                                                                            |
| Bains SJ, et al. 2016 (21)                        | Norway         | HR(95%CI)<br>Timing 4<br>CSS 0.77 (0.71-0.84)<br>OS 0.86 (0.81-0.92)<br>Timing 5<br>CSS 1.00 (0.87-1.14)<br>OS 1.06 (0.96-1.18)<br>Timing 6<br>CSS 0.85(0.79-0.92)<br>OS 0.95(0.90-1.01) | —                                                                | HR(95%CI)<br>Rectal<br>Timing 6<br>CSS 0.79 (0.69-0.90)<br>OS 0.91 (0.82-1.02)                                                                                | HR(95%CI)<br>Stage IV<br>Timing 6<br>CSS 0.85 (0.74-0.98)<br>OS 0.91 (0.80-1.03)                         | sex, age, site of disease, tumor differentiation, disease stage, surgery, ACE inhibitor/ARB use, NSAIDs/coxib use, statin use, beta blocker use, metformin use                                                                                                                                                                                                                                |
| Frouws MA, et al. 2017 (22)                       | Netherland     | —                                                                                                                                                                                        | —                                                                | HR(95%CI)<br>Colon<br>Timing 4<br>OS 0.55 (0.48-0.63)                                                                                                         | —                                                                                                        | age, sex, stage, surgery, radiotherapy, chemotherapy, comorbidities                                                                                                                                                                                                                                                                                                                           |



|                                                |                  |                                                                      |                                                                                                             |                                                                               |        |  |                                                                                                                                                                                                          |
|------------------------------------------------|------------------|----------------------------------------------------------------------|-------------------------------------------------------------------------------------------------------------|-------------------------------------------------------------------------------|--------|--|----------------------------------------------------------------------------------------------------------------------------------------------------------------------------------------------------------|
|                                                |                  |                                                                      |                                                                                                             | Timing 5<br>OS 0.56 (0.43-0.72)<br>Rectal                                     |        |  |                                                                                                                                                                                                          |
|                                                |                  |                                                                      |                                                                                                             | Timing 4<br>OS 0.63 (0.52-0.75)                                               |        |  |                                                                                                                                                                                                          |
|                                                |                  |                                                                      |                                                                                                             | Timing 5<br>OS 0.41 (0.27-0.63)                                               |        |  |                                                                                                                                                                                                          |
| Frouws MA, et al. 2017 (23)                    | Netherland       | HR(95%CI)<br>Timing 2<br>OS 0.42 (0.37-0.48)                         | —                                                                                                           | —                                                                             | —      |  | age, sex, stage, number of comorbidities, treatment: surgery/ radiotherapy / chemotherapy                                                                                                                |
| Frouws MA, et al. 2017 (24)                    | Netherland       | RR(95%CI)<br>Timing 5<br>OS 0.64 (0.48-0.86)                         | RR(95%CI)<br><i>BRAF</i><br>Timing 5<br>Wild type<br>OS 0.60 (0.44-0.83)<br>Mutation<br>OS 1.11 (0.57-2.16) | —                                                                             | —      |  | age, comorbidity, grade, stage and chemotherapy                                                                                                                                                          |
|                                                |                  |                                                                      | <i>KRAS</i><br>Timing 5<br>Wild type<br>OS 0.67 (0.47-0.97)<br>Mutation<br>OS 0.56 (0.34-0.93)              |                                                                               |        |  |                                                                                                                                                                                                          |
| Giampieri R, et al. 2017 (25)                  | Italy            | HR(95%CI)<br>Timing 5<br>OS 0.43 (0.26-0.72)<br>PFS 0.48 (0.30-0.79) | —                                                                                                           | —                                                                             | —      |  | NA                                                                                                                                                                                                       |
| Gray RT, et al. 2017 (26)<br>Colon cancer only | Northern Ireland |                                                                      |                                                                                                             | HR(95%CI)<br>Colon<br>Timing 1<br>CSS 0.69 (0.47-0.98)<br>OS 0.76 (0.57-1.03) | II-III |  | age, sex, stage, year of diagnosis, grade, MSI status, Eastern Cooperative Oncology Group performance status, family history of colorectal cancer, adjuvant chemotherapy use, Charlson comorbidity score |
|                                                |                  |                                                                      |                                                                                                             | <i>PIK3CA</i><br>Timing 1<br>Wild type<br>CSS 0.69 (0.46-1.05)                |        |  |                                                                                                                                                                                                          |

|                               |         |                                                                      |                                                                                                                                                                                                                                                                                                                                                                                                            |                                                                                                                                |   |                                                                                                                                                                                                           |
|-------------------------------|---------|----------------------------------------------------------------------|------------------------------------------------------------------------------------------------------------------------------------------------------------------------------------------------------------------------------------------------------------------------------------------------------------------------------------------------------------------------------------------------------------|--------------------------------------------------------------------------------------------------------------------------------|---|-----------------------------------------------------------------------------------------------------------------------------------------------------------------------------------------------------------|
|                               |         |                                                                      |                                                                                                                                                                                                                                                                                                                                                                                                            | OS 0.80 (0.57-1.13)<br>Mutation<br>CSS 0.66 (0.22-2.01)<br>OS 0.79 (0.35-1.78)                                                 |   |                                                                                                                                                                                                           |
|                               |         |                                                                      |                                                                                                                                                                                                                                                                                                                                                                                                            | COX-2<br>Timing 1<br>High<br>CSS 0.55 (0.32-0.96)<br>OS 0.64 (0.42-0.98)<br>Low<br>CSS 1.19 (0.68-2.07)<br>OS 1.28 (0.80-2.03) |   |                                                                                                                                                                                                           |
| Hamada T, et al.<br>2017 (27) | The USA | HR(95%CI)<br>Timing 6<br>CSS 0.65 (0.40-1.07)<br>OS 0.74 (0.50-1.09) | HR(95%CI)<br><i>PD-L1</i><br>Low<br>Timing 4<br>CSS 0.09 (0.02-0.32)<br>OS 0.26 (0.11-0.59)<br>Timing 5<br>CSS 0.17 (0.02-1.41)<br>OS 0.54 (0.22-1.32)<br>Timing 6<br>CSS 0.16 (0.06-0.41)<br>OS 0.38 (0.23-0.65)<br>High<br>Timing 4<br>CSS 1.02 (0.49-2.15)<br>OS 0.87 (0.48-1.60)<br>Timing 5<br>CSS 1.25 (0.61-2.59)<br>OS 1.31 (0.64-2.68)<br>Timing 6<br>CSS 1.01 (0.61-1.67)<br>OS 0.98 (0.62-1.55) | —                                                                                                                              | — | age at diagnosis, year of diagnosis, tumor differentiation, disease stage, microsatellite instability status, long interspersed nucleotide element-1 methylation level, and <i>CDX2</i> expression status |
| Hua XW, et al.<br>2017 (28)   | The USA | HR(95%CI)<br>Timing 3<br>OS 1.05 (0.63-1.74)                         | —                                                                                                                                                                                                                                                                                                                                                                                                          | —                                                                                                                              | — | sex, body mass index, smoking status, stage at diagnosis, and time between baseline and follow-up survey                                                                                                  |

|                                                       |                     |                                                                                                                                                                                                                    |   |                                                                                                                                                  |    |                                                                                                                                                                                         |
|-------------------------------------------------------|---------------------|--------------------------------------------------------------------------------------------------------------------------------------------------------------------------------------------------------------------|---|--------------------------------------------------------------------------------------------------------------------------------------------------|----|-----------------------------------------------------------------------------------------------------------------------------------------------------------------------------------------|
|                                                       |                     | Timing 4<br>CSS 0.45(0.19-1.08)<br>OS 0.89(0.63-1.26)<br>CVDS 0.98 (0.41-2.32)                                                                                                                                     |   |                                                                                                                                                  |    |                                                                                                                                                                                         |
|                                                       |                     | Timing 5<br>CSS 0.39 (0.19-0.78)<br>OS 0.63 (0.46-0.85)<br>CVDS 0.52 (0.21-1.28)                                                                                                                                   |   |                                                                                                                                                  |    |                                                                                                                                                                                         |
|                                                       |                     | Timing 6<br>CSS 0.44 (0.25-0.77)<br>OS 0.74 (0.59-0.94)<br>CVDS 0.68 (0.36-1.29)                                                                                                                                   |   |                                                                                                                                                  |    |                                                                                                                                                                                         |
| Murphy C, et al.<br>2017 (29)<br>Colon cancer<br>only | Australia           |                                                                                                                                                                                                                    | — | Unadjusted<br>HR(95%CI)<br>Colon<br>Timing 2<br>OS 1.26 (0.72-2.21)<br>RFS 0.63(0.30-1.32)                                                       | II | NA                                                                                                                                                                                      |
|                                                       |                     |                                                                                                                                                                                                                    |   | <i>PIK3CA</i><br>Timing 2<br>Mutation<br>OS 1.76 (0.51-6.04)<br>RFS 0.45 (0.06-3.70)<br>Wild type<br>OS 2.50 (1.46-4.28)<br>RFS 0.77 (0.34-1.73) |    |                                                                                                                                                                                         |
| Gray RT, et al.<br>2018 (30)                          | Northern<br>Ireland | HR(95%CI)<br>Timing 4<br>CSS 0.80 (0.56-1.13)<br>OS 0.88 (0.67-1.17)<br>Timing 5<br>CSS 1.51 (1.12-2.05)<br>OS 1.53(1.19-1.95)<br>Timing 6<br>CSS 1.17 (1.00-1.36)<br>OS 1.21 (1.07-1.37)<br>CVDS 1.63 (1.15-2.29) | — | HR(95%CI)<br>Colon<br>Timing 6<br>CSS 1.13 (0.94-1.36)<br>Rectal<br>Timing 6<br>CSS 1.26 (0.94-1.69)                                             | —  | age, sex, year of diagnosis, deprivation, tumor site (colon or rectum), stage, grade, cancer treatment within 6 months (radiotherapy, chemotherapy, surgery), comorbidities, statin use |

|                                |                     |                                                                                                                                                                                                                                     |   |                                                                                                                                                                                            |   |                                                                                             |
|--------------------------------|---------------------|-------------------------------------------------------------------------------------------------------------------------------------------------------------------------------------------------------------------------------------|---|--------------------------------------------------------------------------------------------------------------------------------------------------------------------------------------------|---|---------------------------------------------------------------------------------------------|
| Rouette J, et al.<br>2018 (31) | Canada              | HR(95%CI)<br>Timing 2<br>OS 1.09 (0.96-1.22)                                                                                                                                                                                        | — | —                                                                                                                                                                                          | — | NA                                                                                          |
| Conference<br>abstract         |                     |                                                                                                                                                                                                                                     |   |                                                                                                                                                                                            |   |                                                                                             |
| Tsoi K KF, et al.<br>2018 (32) | Hong Kong,<br>China | Unadjusted HR(95%CI)<br>Timing 1<br>CSS 0.59 (0.56-0.62)<br>OS 1.43(1.42-1.44)<br>GIBS 1.09 (1.00-1.19)<br>CVDS 4.22 (4.11-4.33)<br>CBDS 2.12 (2.06-2.19)                                                                           | — | Unadjusted<br>HR(95%CI)<br>Colon<br>Timing 1<br>CSS 0.60 (0.57-0.64)<br>Rectal<br>Timing 1<br>CSS 0.56 (0.51-0.61)                                                                         | — | NA                                                                                          |
| Case-control                   |                     |                                                                                                                                                                                                                                     |   |                                                                                                                                                                                            |   |                                                                                             |
| Ventura L, et al.<br>2018 (33) | Italy               | HR(95%CI)<br>Timing 1<br>CCS 0.71 (0.52-0.97)<br>OS 1.18 (1.12-1.23)<br>Risk of major bleeding<br>1.11 (0.86-1.44)                                                                                                                  | — | HR(95%CI)<br>Colon<br>Timing 1<br>CCS 0.71 (0.50-1.01)<br>Rectal<br>Timing 1<br>CCS 0.79 (0.39-1.59)                                                                                       | — | sex, age, consumption of drugs linked with<br>metabolic syndrome, socio-economics<br>status |
| Sung JJY, et al.<br>2019 (34)  | Hong Kong,<br>China | HR(95%CI)<br>Timing 4<br>CCS 0.70 (0.60-0.82)<br>OS 0.62 (0.56-0.69)<br>CVDS 1.38 (0.89-2.12)<br>CBDS 0.88 (0.52-1.49)<br>Timing 5<br>CCS 0.87 (0.78-0.96)<br>OS 0.89 (0.83-0.96)<br>CVDS 3.14 (2.32-4.26)<br>CBDS 2.23 (1.47-3.38) | — | Unadjusted<br>HR(95%CI)<br>Colon<br>Timing 4<br>CCS 0.63 (0.53-0.76)<br>Timing 5<br>CCS 0.88 (0.78-0.99)<br>Rectal<br>Timing 4<br>CCS 1.00 (0.72-1.40)<br>Timing 5<br>CCS 1.00 (0.83-1.23) | — | Cardiovascular and cerebrovascular<br>diseases, NSAIDs, chemotherapy                        |

<sup>a</sup>Timing 1-Ever use, Timing 2- Prediagnosis use, Timing 3- aspirin use only before diagnosis, Timing 4- Continued use, Timing 5- Postdiagnosis use, Timing 6-Aspirin use after diagnosis regardless of its usage before diagnosis. HR = hazard ratio, RR = risk ratio, OR = odds ratio, CI = confidence interval, CSS = cancer-specific survival, OS = overall survival, BMI = body mass index, NSAIDs = non-steroidal anti-inflammatory drugs; CRC = colorectal cancer, LINE-1 = long interspersed nucleotide element-1, COX2 = cyclooxygenase-2, RFS = relapse free survival, DFS = disease free survival, PFS = progression free survival, sTNF-RII = soluble tumor necrosis factor-receptor II.

**Supplementary Table 3. Newcastle-Ottawa Scale for Cohort Study Quality<sup>a</sup>**

| Study                          | Selection                                |                                     |                           |                                                                          | Comparability <sup>b</sup> | Outcome               |                                                 |                               |
|--------------------------------|------------------------------------------|-------------------------------------|---------------------------|--------------------------------------------------------------------------|----------------------------|-----------------------|-------------------------------------------------|-------------------------------|
|                                | Representativeness of the exposed cohort | Selection of the non-exposed cohort | Ascertainment of exposure | Demonstration that outcome of interest was not present at start of study |                            | Assessment of outcome | Was follow-up long enough for outcomes to occur | Adequacy of follow up cohorts |
| Chan AT, et al. 2009 (1)       | --                                       | ☆                                   | --                        | ☆                                                                        | ☆☆                         | ☆                     | ☆                                               | ☆                             |
| Zell JA, et al. 2009 (2)       | --                                       | ☆                                   | --                        | ☆                                                                        | ☆☆                         | ☆                     | --                                              | ☆                             |
| Coghill AE, et al. 2011 (4)    | ☆                                        | ☆                                   | --                        | ☆                                                                        | ☆☆                         | ☆                     | ☆                                               | ☆                             |
| Bastiaannet E, et al. 2012 (5) | ☆                                        | ☆                                   | ☆                         | ☆                                                                        | ☆☆                         | ☆                     | ☆                                               | ☆                             |
| Liao X, et al. 2012 (6)        | ☆                                        | ☆                                   |                           | ☆                                                                        | ☆☆                         | ☆                     | ☆                                               | ☆                             |
| Reimers MS, et al. 2012 (7)    | --                                       | ☆                                   | ☆                         | ☆                                                                        | ☆☆                         | ☆                     | --                                              | ☆                             |
| Walker AJ, et al. 2012 (8)     | ☆                                        | ☆                                   | --                        | ☆                                                                        | ☆                          | ☆                     | ☆                                               | ☆                             |
| Chae YK, et al. 2013 (9)       | --                                       | ☆                                   | --                        | ☆                                                                        | --                         | --                    | --                                              | ☆                             |
| Domingo E, et al. 2013 (10)    | --                                       | ☆                                   | --                        | ☆                                                                        | ☆☆                         | ☆                     | ☆                                               | ☆                             |
| McCowan C, et al. 2013 (11)    | ☆                                        | ☆                                   | ☆                         | ☆                                                                        | ☆☆                         | ☆                     | ☆                                               | ☆                             |
| Sun R, et al. 2013 (12)        | ☆                                        | ☆                                   | --                        | ☆                                                                        | --                         | --                    | --                                              | ☆                             |
| Goh CH, et al. 2014 (14)       | ☆                                        | ☆                                   | ☆                         | ☆                                                                        | --                         | ☆                     | --                                              | ☆                             |
| Reimers MS, et al. 2014 (15)   | ☆                                        | ☆                                   | ☆                         | ☆                                                                        | ☆☆                         | ☆                     | --                                              | ☆                             |
| Kothari N et al, 2015 (16)     | --                                       | ☆                                   | ☆                         | ☆                                                                        | --                         | --                    | ☆                                               | ☆                             |
| Ng K, et al. 2015 (17)         | --                                       | ☆                                   | --                        | ☆                                                                        | ☆                          | ☆                     | ☆                                               | ☆                             |
| Restivo A, et al. 2015 (18)    | --                                       | ☆                                   | ☆                         | ☆                                                                        | --                         | --                    | ☆                                               | ☆                             |
| Zanders MM, et al. 2015 (19)   | --                                       | ☆                                   | ☆                         | ☆                                                                        | ☆☆                         | ☆                     | ☆                                               | ☆                             |
| Babic A, et                    | ☆                                        | ☆                                   | ☆                         | ☆                                                                        | --                         | --                    | --                                              | ☆                             |

|                               |    |   |    |   |    |    |    |    |   |
|-------------------------------|----|---|----|---|----|----|----|----|---|
| al. 2016 (20)                 |    |   |    |   |    |    |    |    |   |
| Bains SJ, et al. 2016 (21)    | ☆  | ☆ | ☆  | ☆ | ☆☆ | ☆  | ☆  | ☆  | ☆ |
| Frouws MA, et al. 2017 (22)   | ☆  | ☆ | ☆  | ☆ | -- | -- | -- | -- | ☆ |
| Frouws MA, et al. 2017 (23)   | ☆  | ☆ | ☆  | ☆ | ☆☆ | ☆  | ☆  | ☆  | ☆ |
| Frouws MA, et al. 2017 (24)   | ☆  | ☆ | ☆  | ☆ | ☆☆ | ☆  | -- | -- | ☆ |
| Giampieri R, et al. 2017 (25) | -- | ☆ | -- | ☆ | -- | -- | -- | -- | ☆ |
| Gray RT, et al. 2017(26)      | -- | ☆ | ☆  | ☆ | ☆☆ | ☆  | ☆  | ☆  | ☆ |
| Hamada T, et al. 2017 (27)    | ☆  | ☆ | -- | ☆ | ☆☆ | ☆  | ☆  | ☆  | ☆ |
| Hua XW, et al, 2017 (28)      | ☆  | ☆ | -- | ☆ | ☆☆ | ☆  | ☆  | ☆  | ☆ |
| Murphy C, et al. 2017 (29)    | -- | ☆ | ☆  | ☆ | -- | ☆  | -- | -- | ☆ |
| Gray RT, et al, 2018 (30)     | -- | ☆ | ☆  | ☆ | ☆☆ | ☆  | ☆  | ☆  | ☆ |
| Rouette J, et al. 2018 (31)   | ☆  | ☆ | -- | ☆ | -- | -- | -- | -- | ☆ |
| Ventura L, et al. 2018 (33)   | ☆  | ☆ | -- | ☆ | ☆  | ☆  | -- | -- | ☆ |
| Sung JJY, et al. 2019 (34)    | ☆  | ☆ | ☆  | ☆ | -- | ☆  | -- | -- | ☆ |

<sup>a</sup> A study can be awarded a maximum of one star for each numbered item within the Selection and Outcome categories. A maximum of two stars can be given for Comparability

<sup>b</sup>If the study controls for age (the most important factor) or cancer stage (the second important factor), one star can be awarded. If the study controls for both factors, two stars can be awarded.

**Supplementary Table 4. Newcastle-Ottawa Scale for Case-Control Study Quality<sup>a</sup>**

| Study                         | Selection                   |                                 |                       |                        | Comparability <sup>b</sup><br>Comparability of cases and controls on the basis of the design or analysis | Exposure               |                                                    |                   |
|-------------------------------|-----------------------------|---------------------------------|-----------------------|------------------------|----------------------------------------------------------------------------------------------------------|------------------------|----------------------------------------------------|-------------------|
|                               | Adequacy of case definition | Representativeness of the cases | Selection of controls | Definition of controls |                                                                                                          | Assessment of exposure | Same method of ascertainment of cases and controls | Non-response rate |
| Din FV, et al. 2010 (3)       | ☆                           | --                              | ☆                     | ☆                      | ☆☆                                                                                                       | --                     | ☆                                                  |                   |
| Cardwell CR, et al. 2014 (13) | ☆                           | ☆                               | ☆                     | ☆                      | ☆                                                                                                        | --                     | ☆                                                  |                   |
| Tsoi K KF, et al. 2018 (32)   | ☆                           | ☆                               | ☆                     | ☆                      | --                                                                                                       | --                     | ☆                                                  |                   |

<sup>a</sup> A study can be awarded a maximum of one star for each numbered item within the Selection and Exposure categories. A maximum of two stars can be given for Comparability.

<sup>b</sup> If the study controls for age (the most important factor) or cancer stage (the second important factor), one star can be awarded. If the study controls for both factors, two stars can be awarded.

## Supplementary Figures

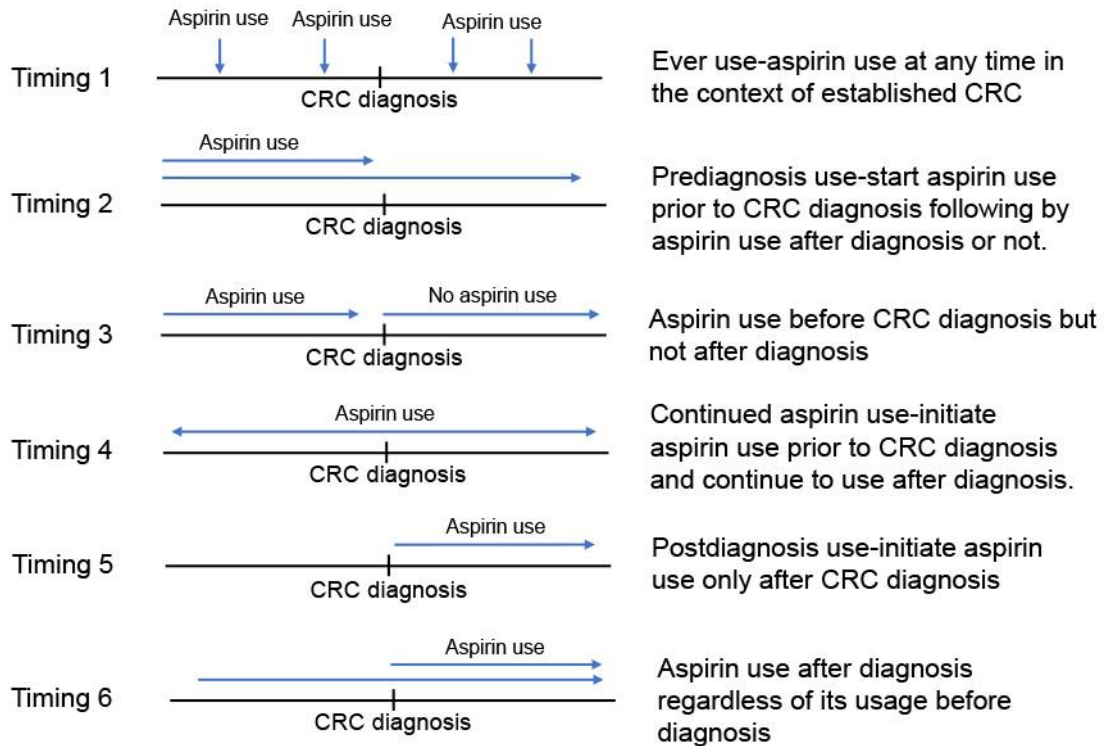

**Supplementary Figure 1. Graphical illustration of different timing of aspirin use.**

CRC = colorectal cancer.



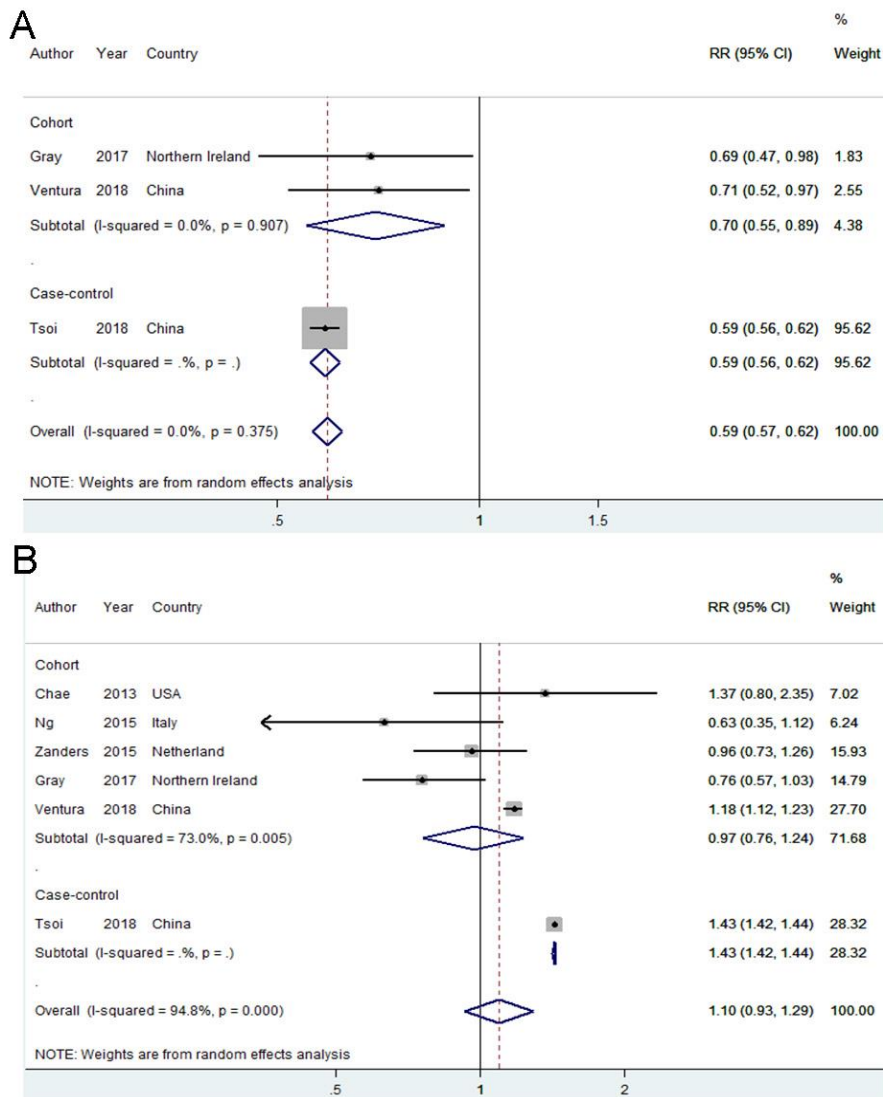

**Supplementary Figure 2. Forest plots of ever use of aspirin in relation to CRC mortality.** A cancer-specific mortality; B all-cause mortality. RR was calculated using the Mantel-Haenszel random-effects model and P value from the z test to exam whether the pooled effect was statistically significant. All statistical tests were 2-sided. The error bars represents 95%CI of individual study, and the size of the diamonds in grey represents the weight of each study in the pooled estimate. Diamonds in blue represent the pooled effect. RR = risk ratio; CI = confidence interval.

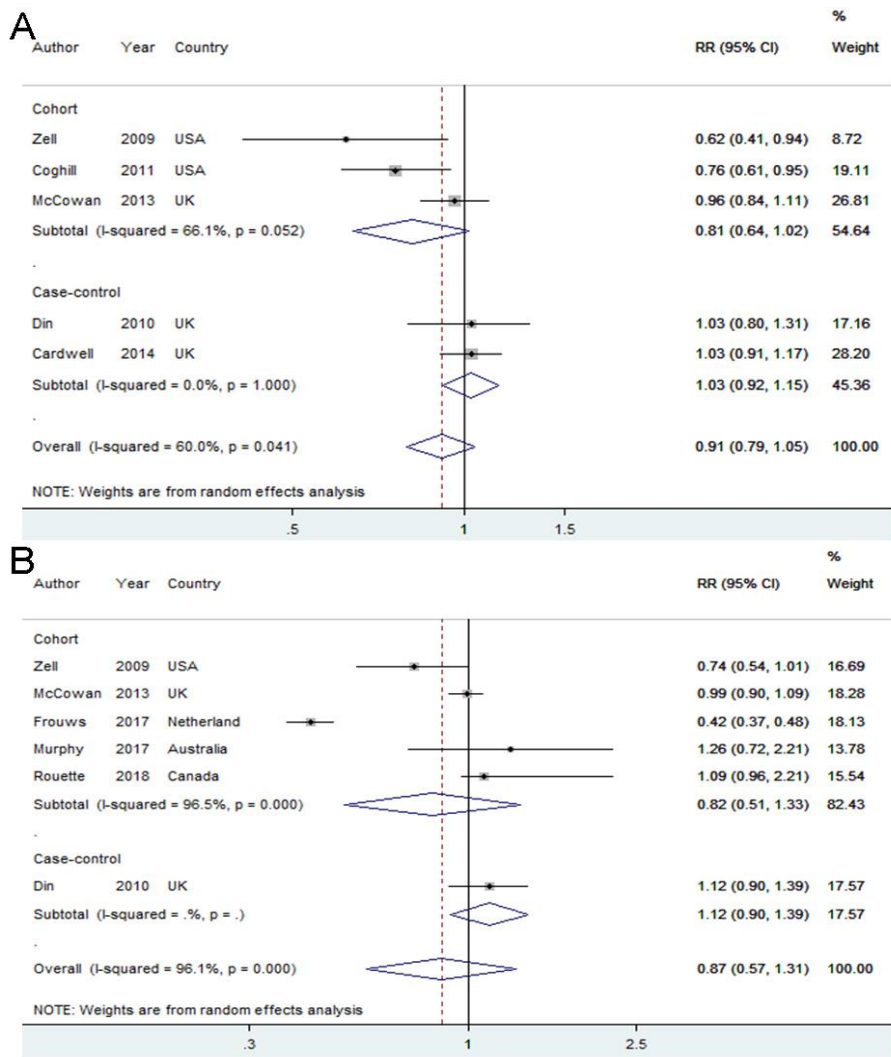

**Supplementary Figure 3. Forest plots of prediagnosis use of aspirin use in relation to CRC mortality. A cancer-specific mortality; B all-cause mortality. RR was calculated using the Mantel-Haenszel random-effects model and P value from the z test to exam whether the pooled effect was statistically significant. All statistical tests were 2-sided. The error bars represents 95%CI of individual study, and the size of the diamonds in grey represents the weight of each study in the pooled estimate. Diamonds in blue represent the pooled effect. RR = risk ratio; CI = confidence interval.**

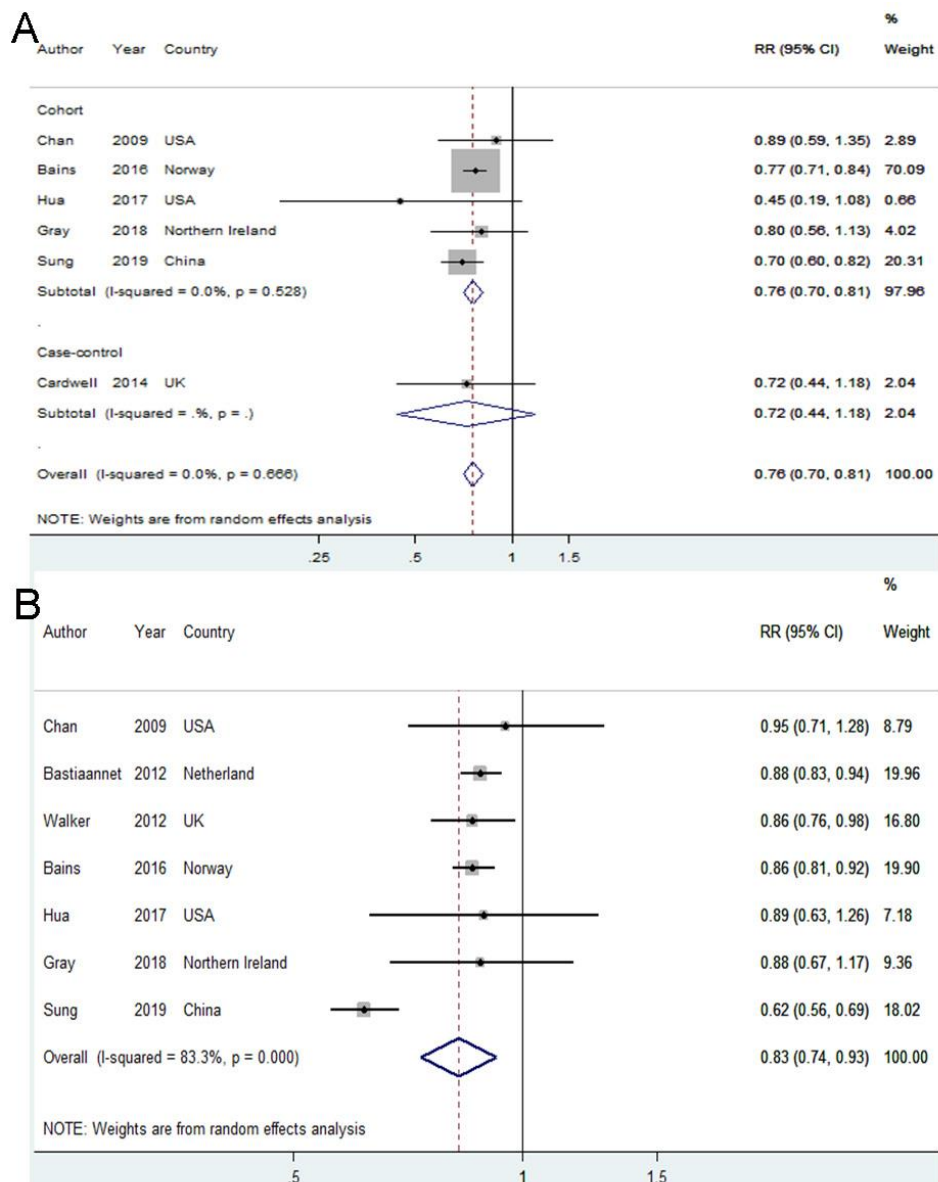

**Supplementary Figure 4. Forest plots of continued use of aspirin use in relation to CRC mortality.** A cancer-specific mortality; B all-cause mortality. RR was calculated using the Mantel-Haenszel random-effects model and P value from the z test to examine whether the pooled effect was statistically significant. All statistical tests were 2-sided. The error bars represent 95%CI of individual study, and the size of the diamonds in grey represents the weight of each study in the pooled estimate. Diamonds in blue represent the pooled effect. RR = risk ratio; CI = confidence interval.

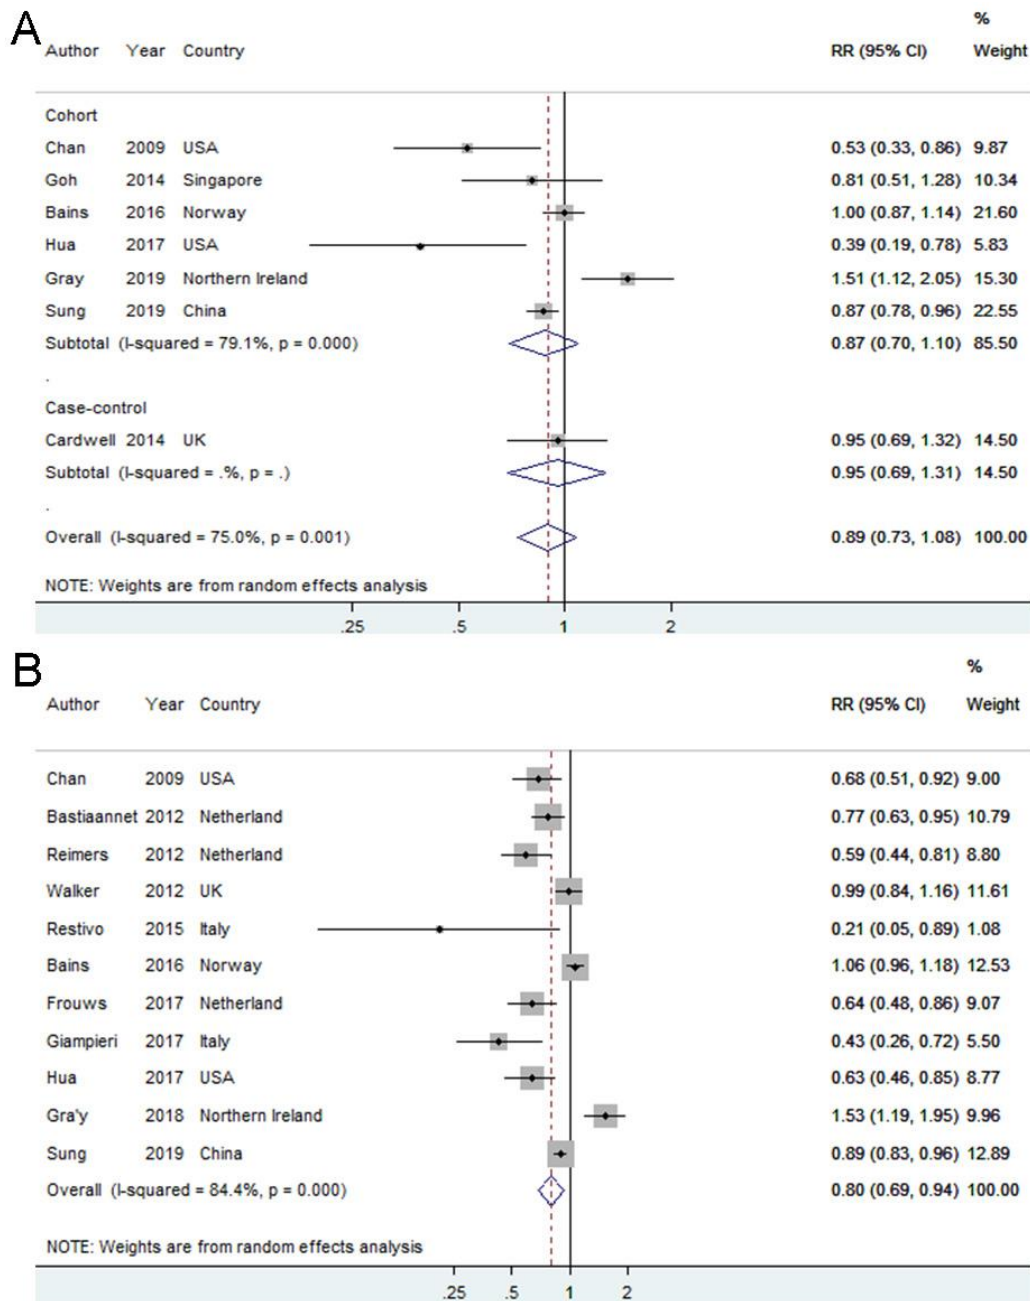

**Supplementary Figure 5. Forest plots of postdiagnosis use of aspirin use in relation to CRC mortality. A cancer-specific mortality; B all-cause mortality. RR was calculated using the Mantel-Haenszel random-effects model and P value from the z test to exam whether the pooled effect was statistically significant. All statistical tests were 2-sided. The error bars represents 95%CI of individual study, and the size of the diamonds in grey represents the weight of each study in the pooled estimate. Diamonds in blue represent the pooled effect. RR = risk ratio; CI = confidence interval.**

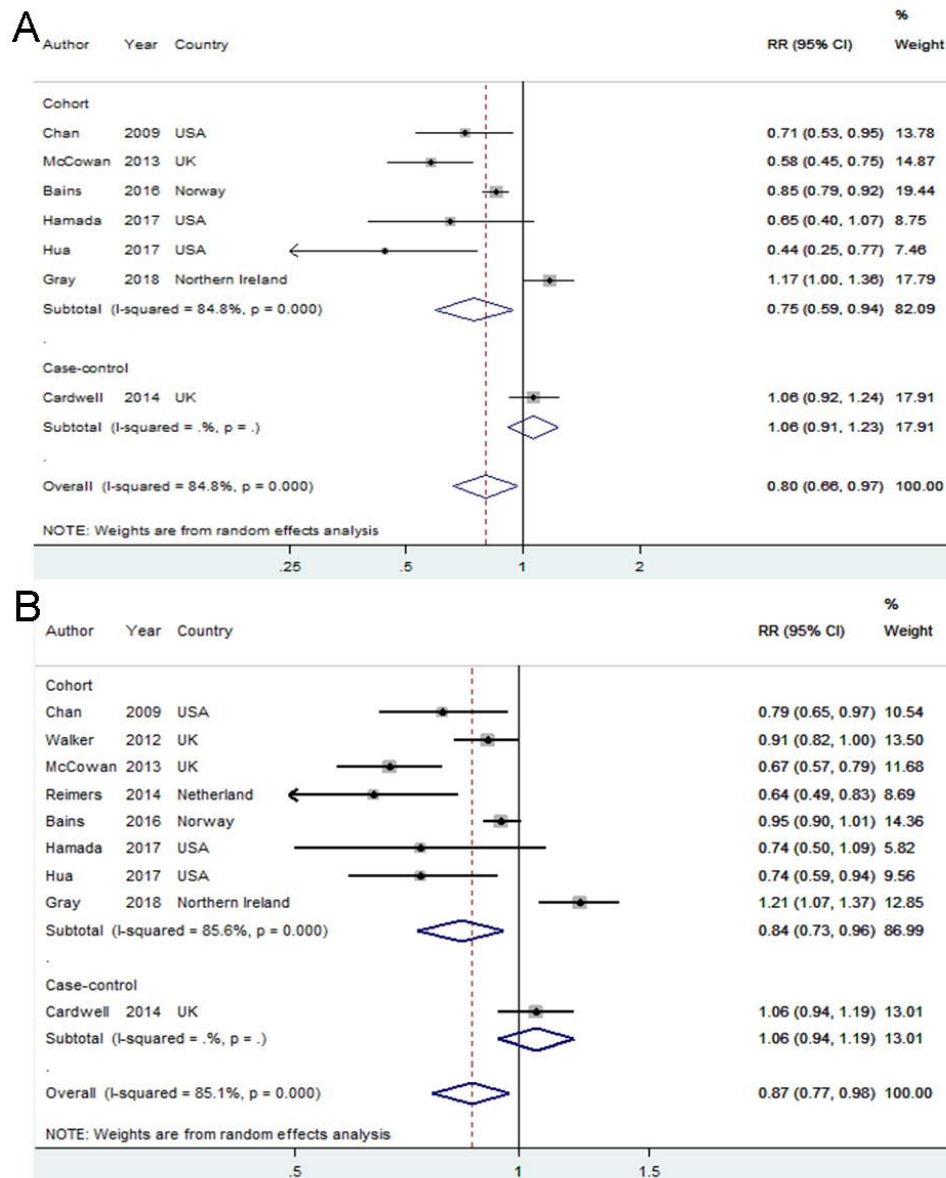

**Supplementary Figure 6. Forest plots of CRC mortality regarding aspirin use after diagnosis regardless of its use before diagnosis. A cancer-specific mortality; B all-cause mortality. RR was calculated using the Mantel-Haenszel random-effects model and P value from the z test to exam whether the pooled effect was statistically significant. All statistical tests were 2-sided. The error bars represents 95%CI of individual study, and the size of the diamonds in grey represents the weight of each study in the pooled estimate. Diamonds in blue represent the pooled effect. RR = risk ratio; CI = confidence interval.**

## Reference

1. Chan AT, Ogino S, Fuchs CS. Aspirin use and survival after diagnosis of colorectal cancer. *JAMA* 2009;302(6):649-658.
2. Zell JA, Ziogas A, Bernstein L, *et al.* Nonsteroidal anti-inflammatory drugs: effects on mortality after colorectal cancer diagnosis. *Cancer* 2009;115(24):5662-71.
3. Din FV, Theodoratou E, Farrington SM, *et al.* Effect of aspirin and NSAIDs on risk and survival from colorectal cancer. *Gut* 2010;59(12):1670-9.
4. Coghill AE, Newcomb PA, Campbell PT, *et al.* Prediagnostic non-steroidal anti-inflammatory drug use and survival after diagnosis of colorectal cancer. *Gut* 2011;60(4):491-8.
5. Bastiaannet E, Sampieri K, Dekkers OM, *et al.* Use of aspirin postdiagnosis improves survival for colon cancer patients. *Br J Cancer* 2012;106(9):1564-70.
6. Liao X, Lochhead P, Nishihara R, *et al.* Aspirin use, tumor PIK3CA mutation, and colorectal-cancer survival. *N Engl J Med* 2012;367(17):1596-606.
7. Reimers MS, Bastiaannet E, van Herk-Sukel MP, *et al.* Aspirin use after diagnosis improves survival in older adults with colon cancer: a retrospective cohort study. *J Am Geriatr Soc* 2012;60(12):2232-6.
8. Walker AJ, Grainge MJ, Card TR. Aspirin and other non-steroidal anti-inflammatory drug use and colorectal cancer survival: a cohort study. *Br J Cancer* 2012;107(9):1602-7.
9. Chae YK, Kim K, Hong DS, *et al.* PIK3CA mutation, aspirin use and mortality in patients with metastatic colorectal cancer participating in early-phase clinical trials. *Cancer Research* 2013;73(8).
10. Domingo E, Church DN, Sieber O, *et al.* Evaluation of PIK3CA mutation as a predictor of benefit from nonsteroidal anti-inflammatory drug therapy in colorectal cancer. *J Clin Oncol* 2013;31(34):4297-305.
11. McCowan C, Munro AJ, Donnan PT, *et al.* Use of aspirin post-diagnosis in a cohort of patients with colorectal cancer and its association with all-cause and colorectal cancer specific mortality. *Eur J Cancer* 2013;49(5):1049-57.
12. Sun R, Nishihara R, Qian ZR, *et al.* Aspirin and colorectal cancer incidence and mortality by cttnb1 expression: A molecular pathological epidemiology (MPE) study. *Cancer Epidemiology Biomarkers and Prevention* 2013;22(3):472-473.
13. Cardwell CR, Kunzmann AT, Cantwell MM, *et al.* Low-dose aspirin use after diagnosis of colorectal cancer does not increase survival: a case-control analysis of a population-based cohort. *Gastroenterology* 2014;146(3):700-708.
14. Goh CH, Leong WQ, Chew MH, *et al.* Post-operative aspirin use and colorectal cancer-specific survival in patients with stage I-III colorectal cancer. *Anticancer research* 2014;34(12):7407-7414.
15. Reimers MS, Bastiaannet E, Langley RE, *et al.* Expression of HLA class I antigen, aspirin use, and survival after a diagnosis of colon cancer. *JAMA Intern Med* 2014;174(5):732-9.
16. Kothari N, Kim R, Jorissen RN, *et al.* Impact of regular aspirin use on overall and cancer-specific survival in patients with colorectal cancer harboring a PIK3CA mutation. *Acta Oncol* 2015;54(4):487-92.
17. Ng K, Meyerhardt JA, Chan AT, *et al.* Aspirin and COX-2 inhibitor use in patients with stage III colon cancer. *Journal of the National Cancer Institute* 2015;107(1):345-345.
18. Restivo A, Cocco IM, Casula G, *et al.* Aspirin as a neoadjuvant agent during preoperative chemoradiation for rectal cancer. *Br J Cancer* 2015;113(8):1133-9.
19. Zanders MMJ, van Herk-Sukel MPP, Vissers PAJ, *et al.* Are metformin, statin and

aspirin use still associated with overall mortality among colorectal cancer patients with diabetes if adjusted for one another? *Br J Cancer* 2015;113(3):403-410.

20. Babic A, Shah SM, Song M, *et al.* Soluble tumour necrosis factor receptor type II and survival in colorectal cancer. *Br J Cancer* 2016;114(9):995-1002.

21. Bains SJ, Mahic M, Myklebust TÅ, *et al.* Aspirin As Secondary Prevention in Patients With Colorectal Cancer: An Unselected Population-Based Study. *J Clin Oncol* 2016;34(21):2501-2508.

22. Frouws MA, Bastiaannet E, Langley RE, *et al.* Effect of low-dose aspirin use on survival of patients with gastrointestinal malignancies; an observational study. *Br J Cancer* 2017;116(3):405-413.

23. Frouws MA, Rademaker E, Bastiaannet E, *et al.* The difference in association between aspirin use and other thrombocyte aggregation inhibitors and survival in patients with colorectal cancer. *Eur J Cancer* 2017;77:24-30.

24. Frouws MA, Reimers MS, Swets M, *et al.* The Influence of BRAF and KRAS Mutation Status on the Association between Aspirin Use and Survival after Colon Cancer Diagnosis. *PLoS One* 2017;12(1):e0170775.

25. Giampieri R, Restivo A, Pusceddu V, *et al.* The Role of Aspirin as Antitumoral Agent for Heavily Pretreated Patients With Metastatic Colorectal Cancer Receiving Capecitabine Monotherapy. *Clin Colorectal Cancer* 2017;16(1):38-43.

26. Gray RT, Cantwell MM, Coleman HG, *et al.* Evaluation of PTGS2 Expression, PIK3CA Mutation, Aspirin Use and Colon Cancer Survival in a Population-Based Cohort Study. *Clin Transl Gastroenterol* 2017;8(4):e91-e91.

27. Hamada T, Cao Y, Qian ZR, *et al.* Aspirin Use and Colorectal Cancer Survival According to Tumor CD274 (Programmed Cell Death 1 Ligand 1) Expression Status. *J Clin Oncol* 2017;35(16):1836-1844.

28. Hua X, Phipps AI, Burnett-Hartman AN, *et al.* Timing of Aspirin and Other Nonsteroidal Anti-Inflammatory Drug Use Among Patients With Colorectal Cancer in Relation to Tumor Markers and Survival. *J Clin Oncol* 2017;35(24):2806-2813.

29. Murphy C, Turner N, Wong HL, *et al.* Examining the impact of regular aspirin use and PIK3CA mutations on survival in stage 2 colon cancer. *Intern Med J* 2017;47(1):88-98.

30. Gray RT, Coleman HG, Hughes C, *et al.* Low-dose aspirin use and survival in colorectal cancer: results from a population-based cohort study. *BMC cancer* 2018;18(1):228-228.

31. Rouette J, Giorli G, Yin H, *et al.* Pre-diagnostic use of low-dose aspirin and risk of incident metastasis and mortality in patients with colorectal cancer. *Pharmacoepidemiology and Drug Safety* 2018;27:462-463.

32. Tsoi KK, Chan FC, Hirai HW, *et al.* Risk of gastrointestinal bleeding and benefit from colorectal cancer reduction from long-term use of low-dose aspirin: A retrospective study of 612 509 patients. *J Gastroenterol Hepatol* 2018;33(10):1728-1736.

33. Ventura L, Miccinesi G, Barchielli A, *et al.* Does low-dose aspirin use for cardiovascular disease prevention reduce colorectal cancer deaths? A comparison of two cohorts in the Florence district, Italy. *Eur J Cancer Prev* 2018;27(2):134-139.

34. Sung JJY, Ho JMW, Chan FCH, *et al.* Low-dose aspirin can reduce colorectal cancer mortality after surgery: A 10-year follow-up of 13 528 colorectal cancer patients. *J Gastroenterol Hepatol* 2019;34(6):1027-1034.
